# Supplementary material for: Assessing recovery time of ecosystems in China: insights into flash drought impacts on gross primary productivity
Source: Copernicus journal article supplement (doi:10.5194/hess-29-613-2025), 2025-02-04
Supplement: Supplementary file 1 [file hess-29-613-2025-supplement.pdf]

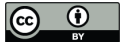

*Supplement of*

## **Assessing recovery time of ecosystems in China: insights into flash drought impacts on gross primary productivity**

**Mengge Lu et al.**

*Correspondence to:* Huaiwei Sun ([hsun@hust.edu.cn](mailto:hsun@hust.edu.cn))

The copyright of individual parts of the supplement might differ from the article licence.

1 This file includes:

2 Figure S1 S2 S3 S4 S5

3

#### 4 S1. Introduction

5 This document provides Supplementary materials for the main *Hydrology and Earth System*  
6 *Sciences* paper. This information consists of three supplementary figures which provide further  
7 information.

8

#### 9 Section S2

10 Figure. S1 shows the definition of land cover classes based on IGBP land classes.

11 Figure S2 shows the location of the middle and lower reaches of the Yangtze River.

12 Figure S3 shows the mean values of soil moisture (SM) and GPP anomaly between -4 pentads  
13 and +9 pentads after flash drought onset.

14 Figure S4 shows the recovery time to original state at 80%(a), 90%(b), 100%(c), and 110%(d)  
15 recovery thresholds.

16 Figure. S5 shows the patten of aridity index and pentad net radiation.

17

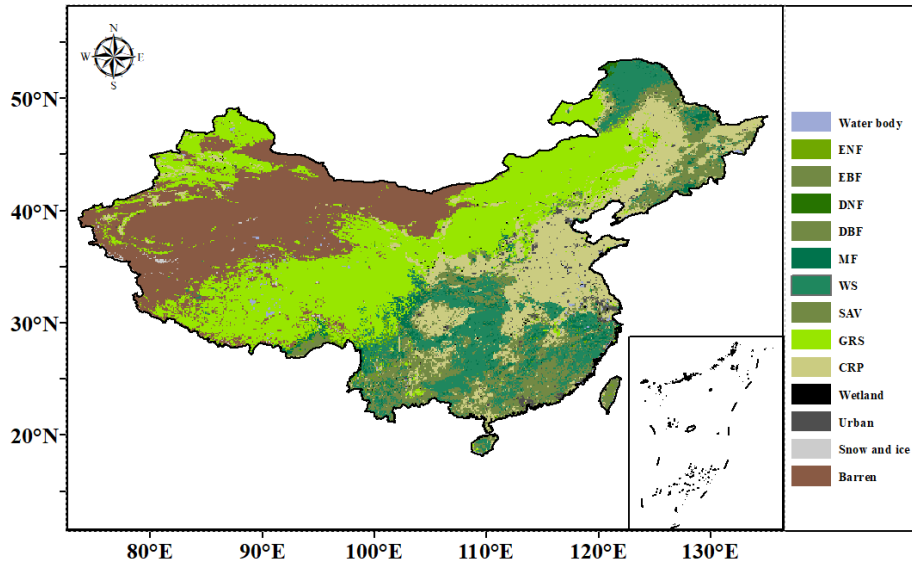

18  
19  
20  
21  
22  
23

Figure. S1. Definition of land cover classes based on IGBP land classes. ENF, evergreen needleleaf forests; EBF, evergreen broadleaf forests; DF, deciduous forests; MF, mixed forests; WS, closed shrubland, open shrubland and woody savannas; SAV, savannas (temperate); GRS, grasslands; CRP, croplands; CRO, croplands and natural vegetation mosaic; Barren, barren sparsely vegetation.

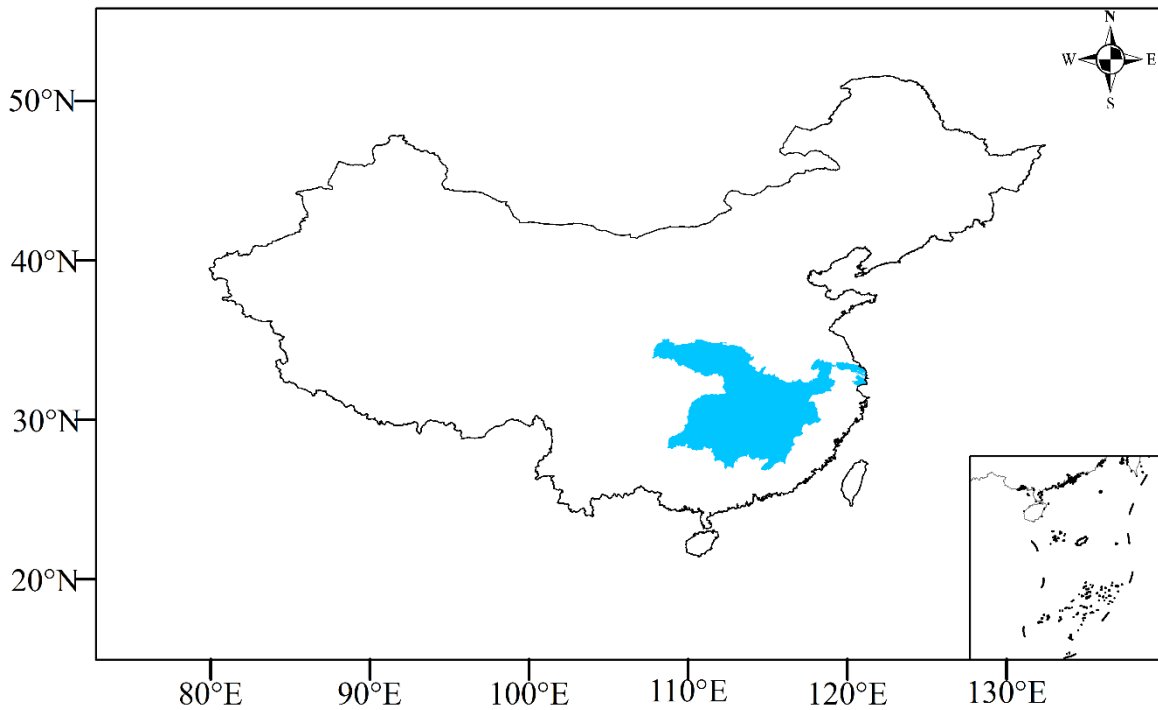

24  
25  
26

Figure. S2. Location of the middle and lower reaches of the Yangtze River.

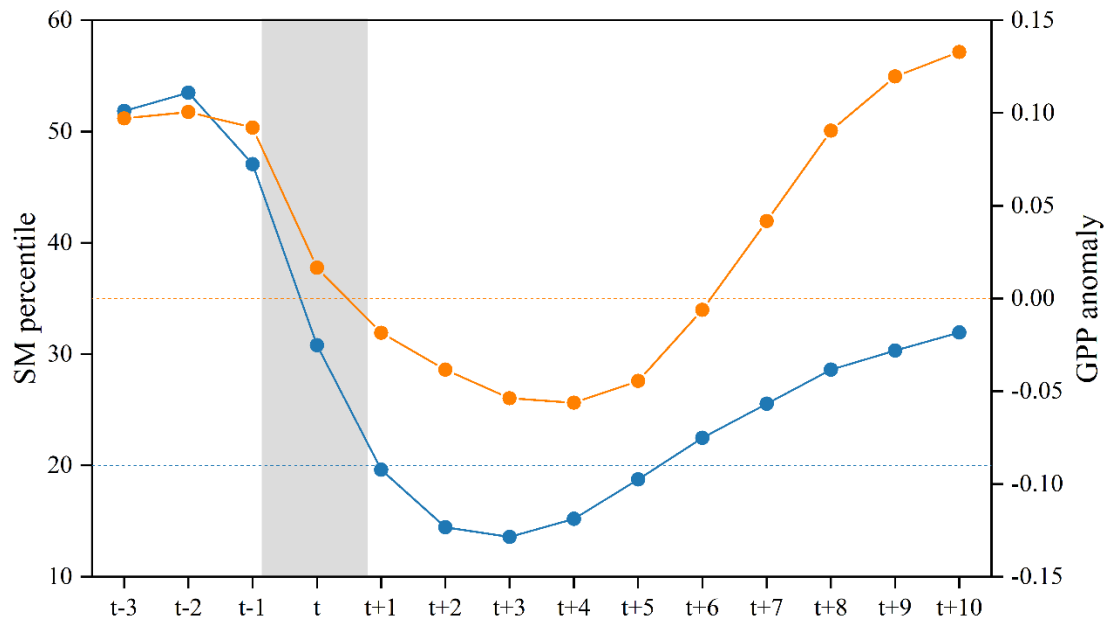

27

28 Figure. S3. The mean values of soil moisture (SM) and GPP anomaly between -4 pentads and  
 29 +9 pentads after flash drought onset.

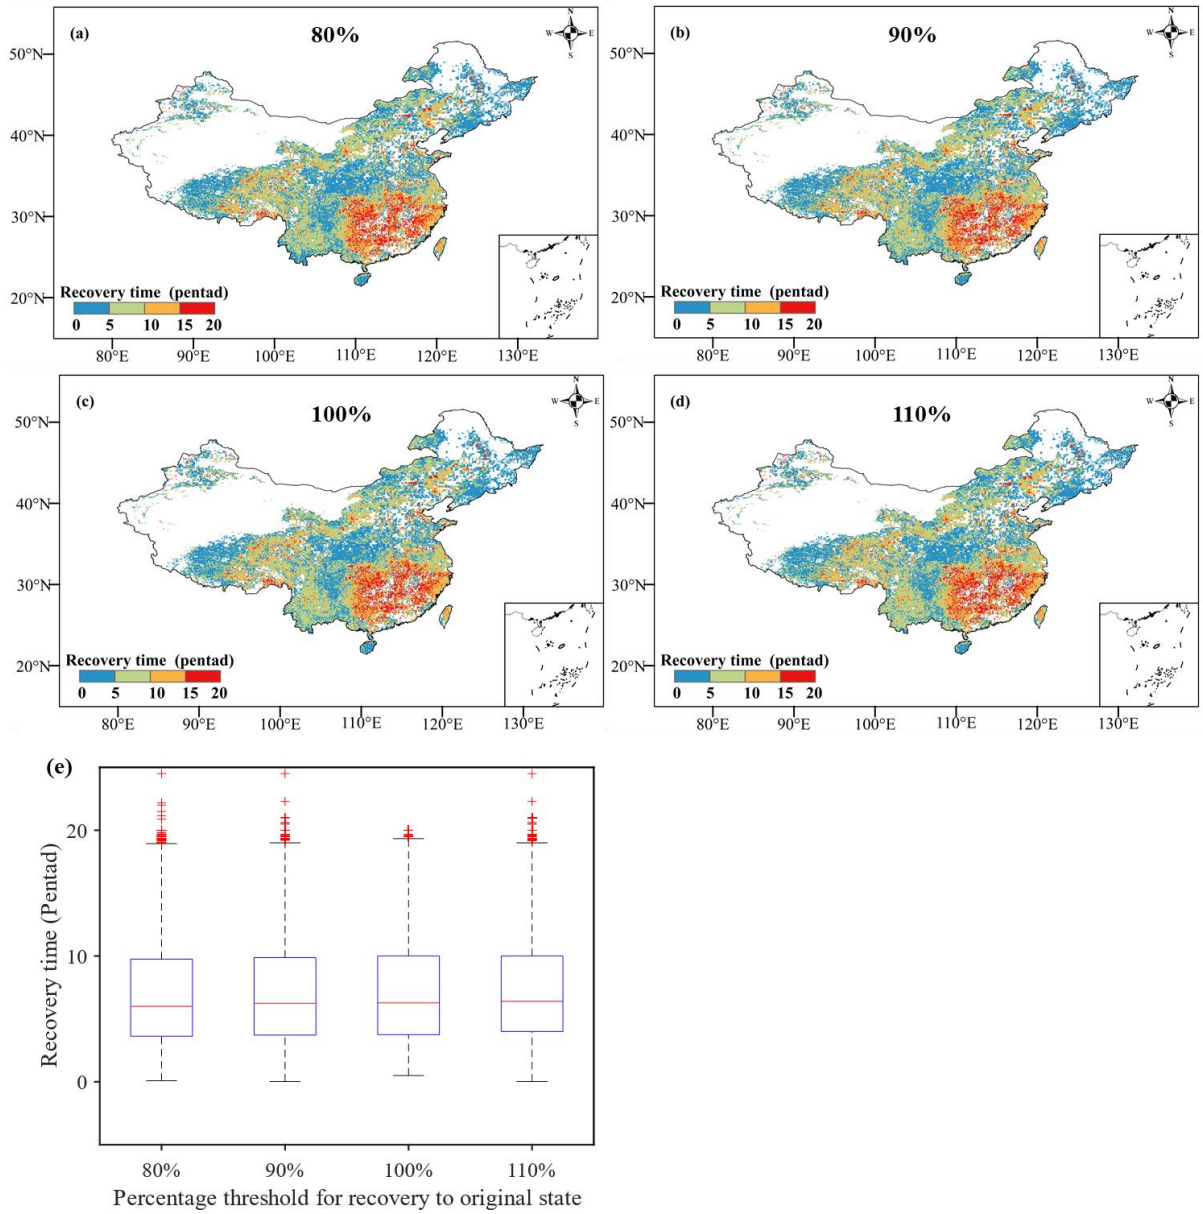

30

31 Figure S4. Recovery time to original state at 80%(a), 90%(b), 100%(c), and 110%(d) recovery  
 32 thresholds. Box plots of recovery time under different recovery thresholds (e). The box plots  
 33 display the maximum, upper quartile, median, lower quartile, and minimum values of the  
 34 recovery time distribution.

35

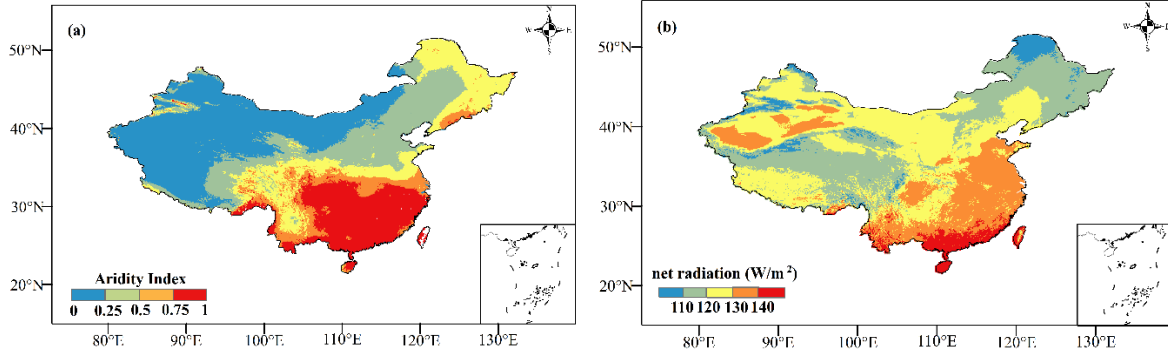

36

37 Figure. S5. The patten of aridity index (a) and pentad net radiation(b).
